# Supplementary material for: Research on Hydrogeochemical Characteristics and Transformation Relationships between Surface Water and Groundwater in the Weihe River
Source: Copernicus journal article supplement (doi:10.5194/hess-2017-654), 2017-12-01
Supplement: Supplementary file [file hess-2017-654-RC1-supplement.pdf]

**Comment:** The work of the manuscript is of sufficient novelty, quality, and potential significance to the publication in the Journal of HESS. I believe the topic of this paper will be of great interest to the readers, and the concepts discussed in this paper are much needed in water resources community. In addition, this paper is well-written. Therefore, the publication is recommended. However, there are some points need to be elaborated before it can be accepted for publication. My comments are provided as follows:

1. The introduction should be rewritten, and a brief introduction of the work whether has been done or not should be written thus highlighting the necessity and importance of this work.
2. References are mostly Chinese literatures, it is recommended to increase some English literatures.
3. It is suggested to modify the references format.
4. It is suggested to add the study area's location on the map of China in figure 1.
5. TH in Table 1 is not described in the text, which can be deleted.
6. The translation of name in figure 4 should be confirmed, which are Evaporation-crystallization dominance, Rock weathering dominance, Atmospheric precipitation dominance.
